# Supplementary material for: Suspension plasma sprayed coatings using dilute hydrothermally produced titania feedstocks for photocatalytic applications
Source: Royal Society of Chemistry journal article supplement (doi:10.1039/c4ta05397d), 2015-01-01
Supplement: c4ta05397d1.pdf [file c4ta05397d1.pdf]

### Additional Information

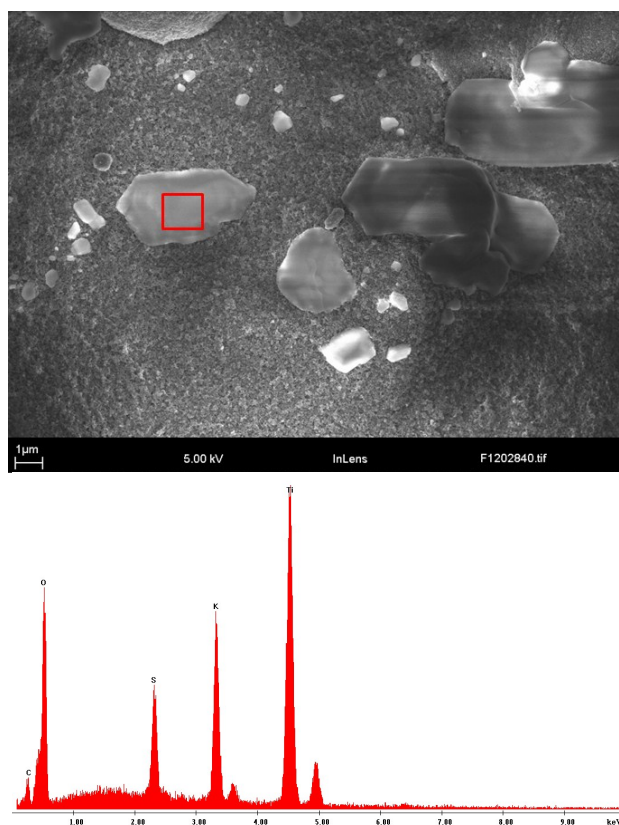

An SEM image of potassium sulphate impurity within a titania coating with associated EDX data.

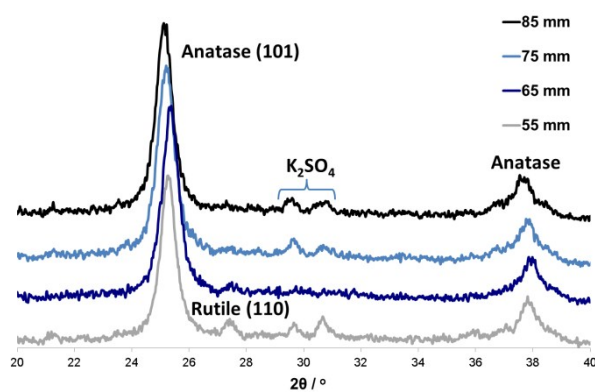

XRD patterns of 12 nm titania coatings produced at the four stand-off distances demonstrating the relative decrease in rutile (110) peak intensity. Also visible is a potassium sulphate impurity.

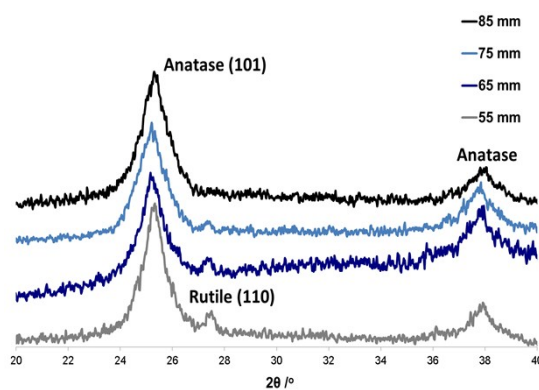

XRD patterns of 6 nm titania coatings produced at the four stand-off distances demonstrating the relative decrease in rutile (110) peak intensity.

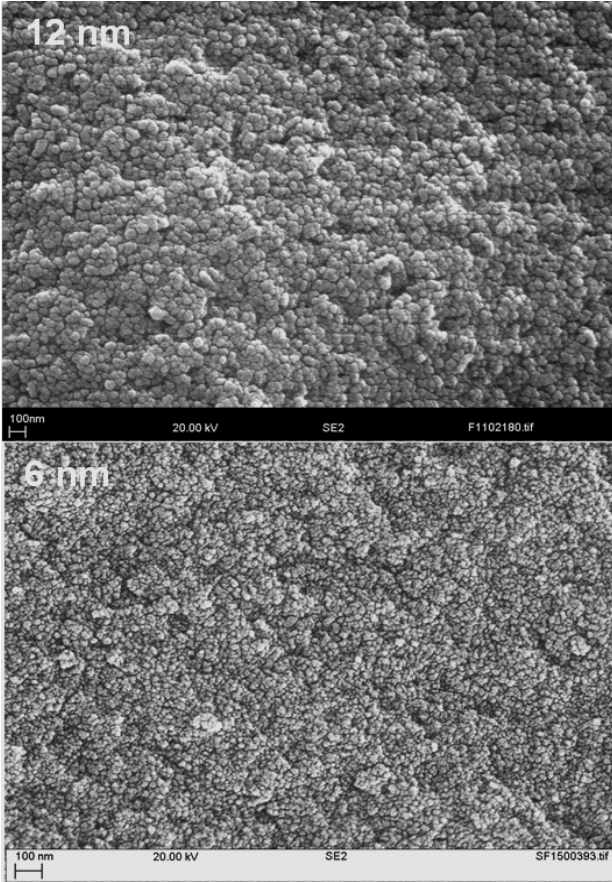

SEM images showing the 12 nm and 6 nm feedstock

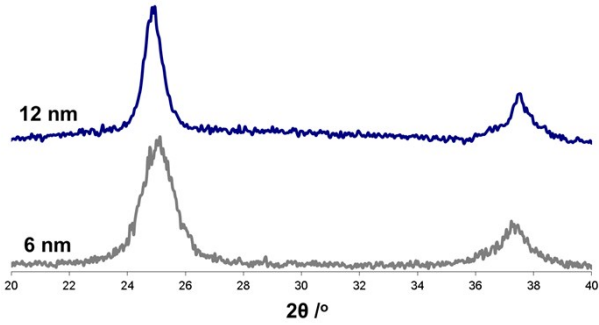

XRD patterns for the 6 and 12 nm feedstock materials.

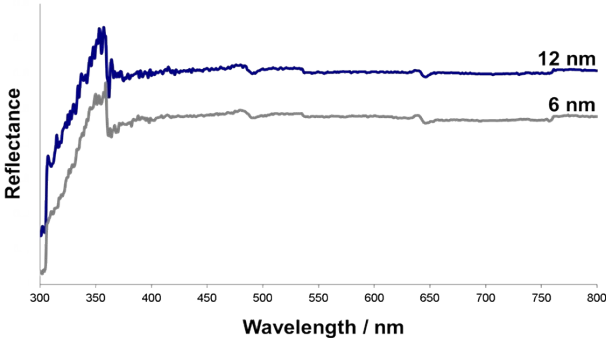

UV-Vis spectra for 6 and 12 nm feedstock materials.
